# Supplementary material for: Removal of Hg2+ with Polypyrrole-Functionalized Fe3O4/Kaolin: Synthesis, Performance and Optimization with Response Surface Methodology
Source: PubMed Central journal article supplement (PMC7407420; doi:10.3390/nano10071370), 2020-07-14
Supplement: nanomaterials-10-01370-s001.pdf [file nanomaterials-10-01370-s001.pdf]

## Supporting Information

# Removal of Hg<sup>2+</sup> with Polypyrrole-Functionalized Fe<sub>3</sub>O<sub>4</sub>/Kaolin: Synthesis, Performance and Optimization with Response Surface Methodology

Zhenfeng Lin <sup>1,2,†</sup>, Ziwei Pan <sup>1,†</sup>, Yuhao Zhao <sup>1</sup>, Lin Qian <sup>1</sup>, Jingtao Shen <sup>1</sup>, Kai Xia <sup>1</sup>, Yongfu Guo <sup>1,3,4,\*</sup> and Zan Qu <sup>5</sup>

<sup>1</sup> Center for Separation and Purification Materials & Technologies, Suzhou University of Science and Technology, Suzhou 215011, China; Linzf@sjhb.cn (Z.L.); 1813022033@post.usts.edu.cn (Z.P.); 1713022014@post.usts.edu.cn (Y.Z.); 1911022009@post.usts.edu.cn (L.Q.); 1913022011@post.usts.edu.cn (J.S.); 1713022009@post.usts.edu.cn (K.X.)

<sup>2</sup> Suzhou Sujing Environmental Engineering Co., Ltd., Suzhou 215122, China

<sup>3</sup> Jiangsu Collaborative Innovation Center of Technology and Material of Water Treatment, Suzhou 215009, China

<sup>4</sup> Jiangsu Provincial Key Laboratory of Environmental Science and Engineering, Suzhou University of Science and Technology, Suzhou 215009, China

<sup>5</sup> School of Environmental Science and Engineering, Shanghai Jiao Tong University, Shanghai 200240, China; quzan@sjtu.edu.cn

\* Correspondence: yongfuguo@mail.usts.edu.cn; Tel.: +86 512 68092987

† These authors contributed equally to this work.

## 1. Effect of adsorbent dosage

The preliminary experiments of adsorbent dosage was carried out at pH = 7,  $C_0 = 40$  mg/L and contact time of 12 h. The adsorbent dosage was 0.05, 0.08, 0.1, 0.12 and 0.15 g/L, respectively. The results are shown in the following figure.

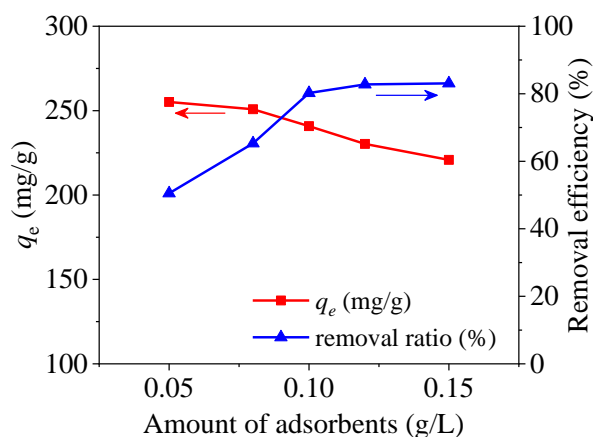

**Fig. S1.** Effect of adsorbent dosage.

From the above figure, it can be seen that the adsorption capacity of PPy-Fe<sub>3</sub>O<sub>4</sub>/Kaolin for mercury was reducing with the increase of addition amount. And the adsorption capacity varied between 220 mg/g and 255 mg/g. The maximum capacity was reached at 0.05 g/L. In addition, it can be known that the removal rate was increased with the increasing dosage. Comprehensively, dosage of 0.05 g/L was selected as the optimal preliminary parameter in the subsequent studies.

## 2. Sample characterizations

The values of surface area (BET) were decided by N<sub>2</sub> adsorption-desorption instrument (Micromeritic TriStarII 3020, Norcross, GA, USA). The morphology was observed by scanning electron microscope (SEM, FEI, Phenom, Hillsboro, TX, USA) and transmission electron microscopy (TEM, JEM-2100F, Tokyo, Japan). X-ray Diffraction analysis (XRD, Bruker D8 Advance Bruker, Karlsruhe, Germany) was applied to investigate the crystallization and phase. Functional groups were identified by Fourier transform infrared spectrophotometer (FT-IR, Thermo, Nicolet-6700, Thermo Scientific, Waltham, MA, USA). Magnetic strength was compared by vibrating sample magnetometer (VSM, Quantum design, PPMS-9, Quantum Design, San Diego, CA, USA). Elements compositions were confirmed by energy-dispersive spectrometer (EDS) and X-ray photoelectron spectroscopy (XPS, Thermo Scientific, 250Xi, Thermo Scientific, Waltham, MA, USA). The concentration of Hg<sup>2+</sup> ions at any time  $t$  (min) was quantified using ICP-OES. The solution of ultrasonic dispersion used an ultrasonicator (SB-5200DT, SCIENTZ, China).

### 3. SEM-mapping

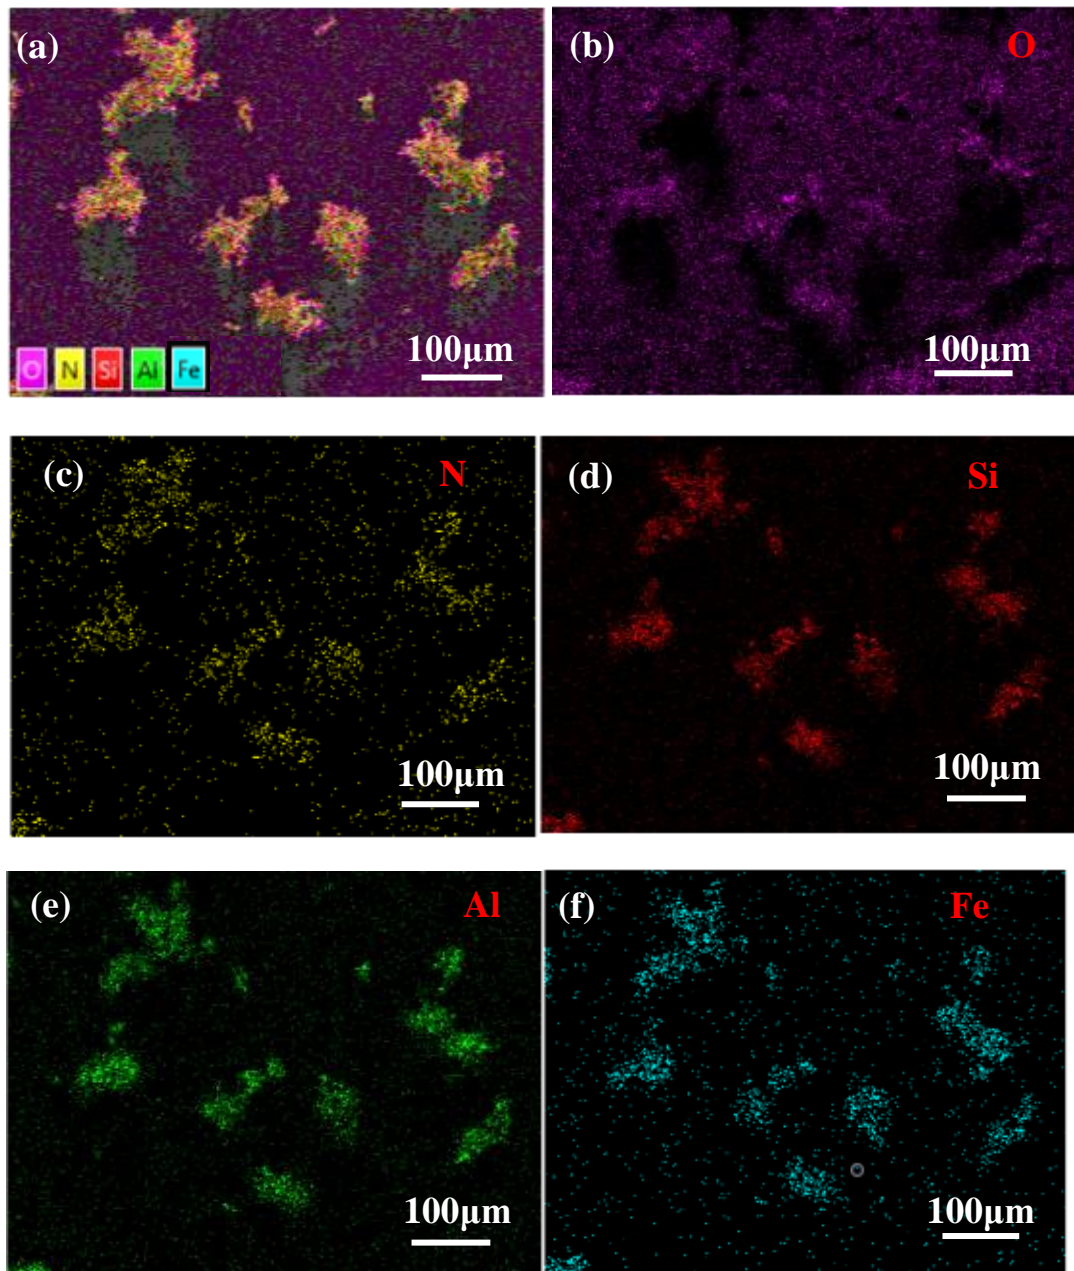

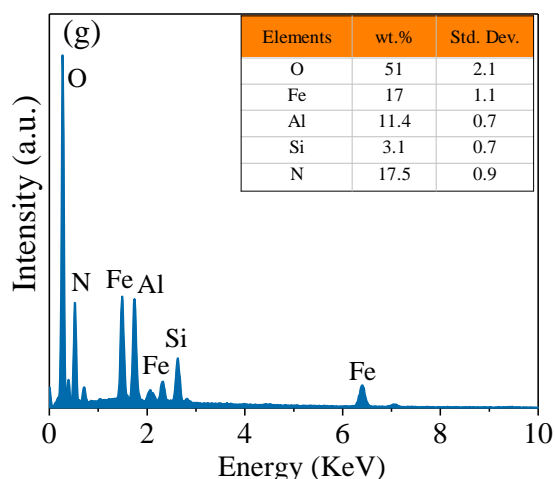

**Fig. S2.** (a) SEM micrograph with X-ray elemental area scanning, (b) EDS mapping of PPy-Fe<sub>3</sub>O<sub>4</sub>/Kaolin (c) O, (d) N, (e) Si, (f) Al and (g) Fe; (g) distribution of elements.

**Table 1.** N<sub>2</sub> adsorption-desorption isothermal data of samples.

| Samples                                    | BET (m <sup>2</sup> /g) | Total pore volume<br>(cm <sup>3</sup> /g) | Pore diameter<br>(nm) |
|--------------------------------------------|-------------------------|-------------------------------------------|-----------------------|
| Kaolin                                     | 10.30                   | 0.03                                      | 11.53                 |
| Fe <sub>3</sub> O <sub>4</sub> /Kaolin     | 39.92                   | 0.07                                      | 6.65                  |
| PPy-Fe <sub>3</sub> O <sub>4</sub> /Kaolin | 84.19                   | 0.17                                      | 8.31                  |

#### 4. XRD

XRD spectra of Kaolin, Fe<sub>3</sub>O<sub>4</sub>/Kaolin and PPy-Fe<sub>3</sub>O<sub>4</sub>/Kaolin are shown in **Fig. S3**. It can be seen from the XRD spectrum that the diffraction peaks of kaolin ( $2\theta = 26.69^\circ, 34.98^\circ, 35.40^\circ, 35.96^\circ, 36.68^\circ, 37.70^\circ, 68.42^\circ, 39.96^\circ, 54.98^\circ$  and  $62.23^\circ$ ) show the crystallinity of kaolin [1]. In the XRD spectrum of Fe<sub>3</sub>O<sub>4</sub>/Kaolin, the peaks at  $2\theta$  of  $30.50^\circ, 35.42^\circ, 43.22^\circ, 53.62^\circ, 57.12^\circ$  and  $62.63^\circ$  can be ascribed to (220), (311), (400), (422), (511) and (440) of Fe<sub>3</sub>O<sub>4</sub> (JCPDS No. 19-0629) [2]. Compared with Fe<sub>3</sub>O<sub>4</sub>/Kaolin, the spectrum of PPy-Fe<sub>3</sub>O<sub>4</sub>/Kaolin has a broad peak between  $15^\circ$  and  $30^\circ$ , which may be caused by the typical characters of the amorphous polymers [3]. Due to the coating of polypyrrole, the characteristic peak of Fe<sub>3</sub>O<sub>4</sub>/Kaolin is weakened. The above results suggest that polypyrrole is successfully synthesized onto Fe<sub>3</sub>O<sub>4</sub>/Kaolin.

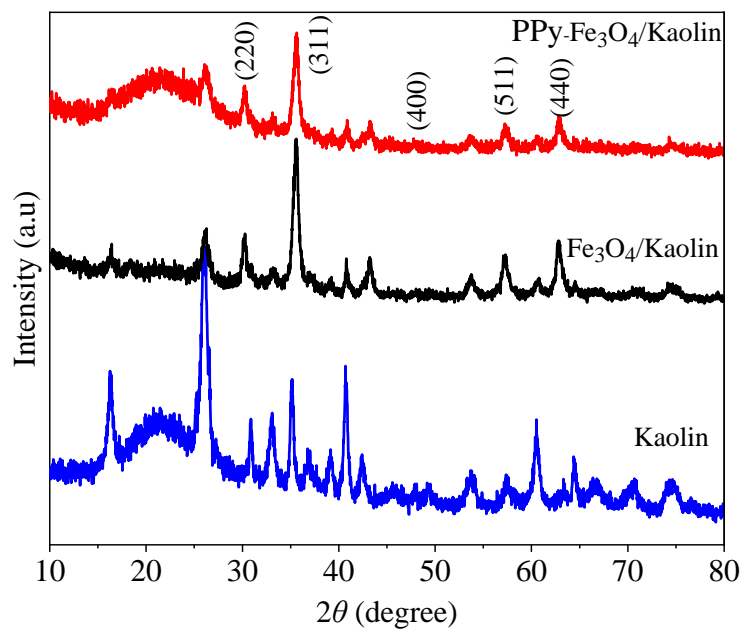

**Fig. S3.** XRD of Kaolin, Fe<sub>3</sub>O<sub>4</sub>/Kaolin, PPy-Fe<sub>3</sub>O<sub>4</sub>/Kaolin.

**Table S2.** Mass percentage of each element in PPy-Fe<sub>3</sub>O<sub>4</sub>/Kaolin.

| Name  | Start B.E. | Peak B.E. | End B.E. | Wt. (%) |
|-------|------------|-----------|----------|---------|
| C 1s  | 297.98     | 284.06    | 279.18   | 63.9    |
| O 1s  | 542.18     | 530.81    | 525.08   | 12.8    |
| Si 2p | 107.38     | 102.62    | 96.08    | 1.3     |
| Al 2p | 84.98      | 80.87     | 65.18    | 2.5     |
| N 1s  | 406.98     | 399.07    | 392.68   | 16.9    |
| Fe 2p | 739.98     | 710.4     | 700.18   | 2.6     |

**Table S3.** CCD matrix and running results obtained by PPy-Fe<sub>3</sub>O<sub>4</sub>/Kaolin.

| Std. | Run | Variables |         |           |            | Response<br>( $q_e$ ) |
|------|-----|-----------|---------|-----------|------------|-----------------------|
|      |     | pH (A)    | $T$ (B) | $C_0$ (C) | Dosage (D) |                       |
| 16   | 1   | 8         | 40      | 50        | 0.06       | 301                   |
| 5    | 2   | 6         | 30      | 50        | 0.04       | 185                   |
| 2    | 3   | 8         | 30      | 30        | 0.04       | 225                   |
| 19   | 4   | 7         | 25      | 40        | 0.05       | 245                   |
| 20   | 5   | 7         | 45      | 40        | 0.05       | 318                   |
| 22   | 6   | 7         | 35      | 60        | 0.05       | 361                   |
| 26   | 7   | 7         | 35      | 40        | 0.05       | 287                   |
| 14   | 8   | 8         | 30      | 50        | 0.06       | 284                   |
| 7    | 9   | 6         | 40      | 50        | 0.04       | 186                   |
| 18   | 10  | 9         | 35      | 40        | 0.05       | 274                   |
| 21   | 11  | 7         | 35      | 20        | 0.05       | 215                   |
| 24   | 12  | 7         | 35      | 40        | 0.07       | 251                   |
| 13   | 13  | 6         | 30      | 50        | 0.06       | 217                   |
| 27   | 14  | 7         | 35      | 40        | 0.05       | 252                   |
| 9    | 15  | 6         | 30      | 30        | 0.06       | 208                   |
| 10   | 16  | 8         | 30      | 30        | 0.06       | 235                   |
| 28   | 17  | 7         | 35      | 40        | 0.05       | 287                   |
| 8    | 18  | 8         | 40      | 50        | 0.04       | 316                   |
| 29   | 19  | 7         | 35      | 40        | 0.05       | 281                   |
| 1    | 20  | 6         | 30      | 30        | 0.04       | 175                   |
| 17   | 21  | 5         | 35      | 40        | 0.05       | 112                   |
| 4    | 22  | 8         | 40      | 30        | 0.04       | 283                   |
| 6    | 23  | 8         | 30      | 50        | 0.04       | 282                   |
| 12   | 24  | 8         | 40      | 30        | 0.06       | 268                   |
| 30   | 25  | 7         | 35      | 40        | 0.05       | 251                   |
| 11   | 26  | 6         | 40      | 30        | 0.06       | 203                   |
| 25   | 27  | 7         | 35      | 40        | 0.05       | 253                   |
| 3    | 28  | 6         | 40      | 30        | 0.04       | 193                   |
| 15   | 29  | 6         | 40      | 50        | 0.06       | 197                   |
| 23   | 30  | 7         | 35      | 40        | 0.03       | 231                   |

**Table S4.** Results of ANOVA of Quadratic mode.

| Terms          | Sum of square | df | Mean square | F-values | p-values |               |
|----------------|---------------|----|-------------|----------|----------|---------------|
| Mode           | 69260.83      | 14 | 11626.84    | 4981     | < 0.0001 | Significant   |
| A-(pH)         | 36955.19      | 1  | 93001.5     | 37209    | < 0.0001 |               |
| B-(T)          | 1783.82       | 1  | 7490.67     | 1796     | < 0.0001 |               |
| C-(C0)         | 2972.64       | 1  | 6800.67     | 1563     | < 0.0001 |               |
| D-(Dosage)     | 507.40        | 1  | 3360.67     | 510      | < 0.0001 |               |
| AB             | 1438.95       | 1  | 3721        | 1448     | < 0.0001 |               |
| AC             | 1712.47       | 1  | 4692.25     | 633      | < 0.0001 |               |
| AD             | 629.01        | 1  | 1936        | 252      | < 0.0001 |               |
| BC             | 308.21        | 1  | 702.25      | 172.49   | < 0.0001 |               |
| BD             | 509.50        | 1  | 1369        | 126.85   | < 0.0001 |               |
| CD             | 2.46          | 1  | 42.25       | 0.149    | 0.704    | Insignificant |
| A <sup>2</sup> | 15493.46      | 1  | 32725.76    | 1560     | < 0.0001 |               |
| B <sup>2</sup> | 1145.90       | 1  | 6309.33     | 1153     | < 0.0001 |               |
| C <sup>2</sup> | 4499.61       | 1  | 8928.05     | 4530     | < 0.0001 |               |
| D <sup>2</sup> | 3885.31       | 1  | 1943.05     | 3912     | < 0.0001 |               |
| Residual       | 17.88         | 18 | 0.99        |          |          |               |
| Lack of Fit    | 2674.08       | 10 | 1.57        | 5.75     | 0.069    | Insignificant |
| Pure Error     | 2.18          | 8  | 0.27        |          |          |               |
| Cor Total      | 69278.72      | 32 |             |          |          |               |

## 5. Models of adsorption kinetics

Three kinetic models were adopted to fit the experimental data: pseudo-first-order model [Eq. (S1)], pseudo-second-order model [Eq. (S2)] and intra-particle diffusion model [Eq. (S3)].

$$q_t = \left(1 - \frac{1}{e^{k_1 t}}\right) q_e \quad (\text{S1})$$

$$q_t = \frac{k_2 t q_e^2}{1 + k_2 t q_e} \quad (\text{S2})$$

$$q_t = k_{d-i} t^{\frac{1}{2}} + C_i \quad (\text{S3})$$

where,  $q_t$  (mg/g) represents instantaneous adsorption capacity;  $k_1$  ( $\text{min}^{-1}$ ),  $k_2$  (g/mg/min) and  $k_{d-i}$  ( $\text{min}^{-1}$ ) are all rate constants;  $C_i$  (mg/g) is the boundary layer thickness.

**Table S5.** Comparison of adsorption capacity of mercury by different adsorbents.

| Adsorbents                                                 | BET ( $\text{m}^2/\text{g}$ ) | pH  | Fitting models | $Q_m$ (mg/g) | Ref. |
|------------------------------------------------------------|-------------------------------|-----|----------------|--------------|------|
| MGO-PAMAM-G3.0                                             | 40.93                         | 3   | Langmuir       | 113.71       | [4]  |
| Magnetic $\text{Fe}_3\text{O}_4$ GO                        | 58.6                          | 6   | Langmuir       | 71.3         | [5]  |
| $\text{CoFe}_2\text{O}_4$ -rGO                             | 69.9                          | 4.6 | Langmuir       | 157.9        | [6]  |
| Coal based activated carbon                                | 442.3                         | 4   | Langmuir       | 48.9         | [7]  |
| $\text{CoFe}_2\text{O}_4$ @ $\text{SiO}_2$ - $\text{NH}_2$ | 17.08                         | 7   | Langmuir       | 149.3        | [8]  |
| Modified nanoporous                                        | 1198.4                        | 6   | Langmuir       | 8.9          | [9]  |
| N-donor arranged SBA15                                     | 715.4                         | 2.5 | Langmuir       | 8.8          | [10] |
| Polypyrrole/SBA-15                                         | 97.6                          | 8   | Langmuir       | 200          | [11] |
| PPy/SH-Beta/MCM-41                                         | -                             | 8   | Freundlich     | 157.4        | [12] |
| Magnetic CNTs/ $\text{Fe}_3\text{O}_4$                     | 97.163                        | 6.5 | Langmuir       | 65.52        | [13] |
| MBT-GO                                                     | -                             | 6.9 | Langmuir       | 107.52       | [14] |
| Diatom silica-SH                                           | 19.3                          | 6   | Langmuir       | 131.7        | [15] |
| SBA-15-SH                                                  | 50.94                         | 8   | Freundlich     | 195.6        | [16] |



| Adsorbents                                 | BET (m <sup>2</sup> /g) | pH | Fitting models | Q <sub>m</sub> (mg/g) | Ref.      |
|--------------------------------------------|-------------------------|----|----------------|-----------------------|-----------|
| PPy-Fe <sub>3</sub> O <sub>4</sub> /Kaolin | 84.19                   | 7  | Langmuir       | 471.2                 | This work |

## 6. Adsorption isotherm models

$$q_e = \frac{Q_m k_L C_e}{1 + k_L C_e} \quad (S4)$$

$$q_e = k_F C_e^{1/n_F} \quad (S5)$$

$$q_e = \frac{RT}{b_i} \ln(K_T C_e) \quad (S6)$$

$$q_e = q_{\max} e^{(-\beta \varepsilon^2)} \quad (S7)$$

$$R_L = \frac{1}{1 + K_L C_0} \quad (S8)$$

$$E = \frac{1}{(2\beta)^{1/2}} \quad (S9)$$

where,  $Q_m$  (mg/g) is the maximal single layer adsorption capacity.  $K_L$  (L/mg),  $K_F$ ,  $q_{\max}$  (mg/g) and  $K_T$  (L/mg) are Langmuir, Freundlich, Temkin and Dubinin-Radushkevich constants.  $1/n_F$  is the uneven factor.  $T$  (K) represents thermodynamic temperature.  $R$  is gas constant (8.314 J/mol/K).  $\beta$  is activity coefficient associated with adsorption energy.  $R_L$  is the separation constant of the Langmuir isotherm model.  $E$  (KJ/mol) is the average adsorption free energy.

## 7. Effect of coexisting ions

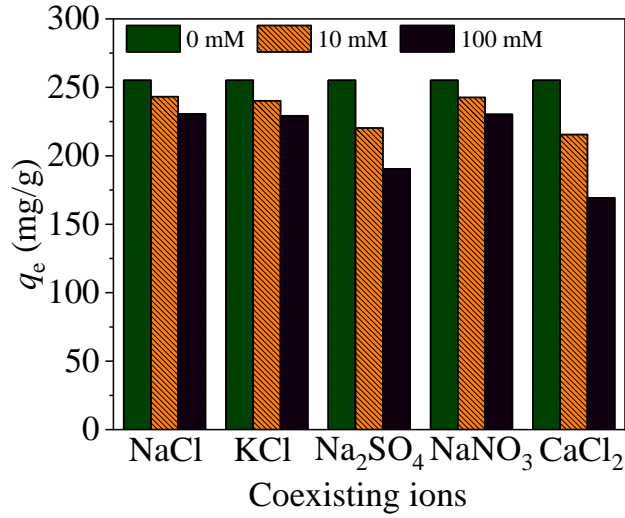

**Fig. S4.** Effect of coexisting ions (pH = 7,  $C_0 = 40$  mg/L,  $T = 273$  K,  $t = 420$  min and dosage of 0.05 g/L).

In this experiment, six common types of ions were selected to evaluate the effect of coexisting ions on the adsorption of mercury ions by PPy-Fe<sub>3</sub>O<sub>4</sub>/Kaolin, which are Na<sup>+</sup>, K<sup>+</sup>, Ca<sup>2+</sup>, Cl<sup>-</sup>, NO<sub>3</sub><sup>-</sup>, and SO<sub>4</sub><sup>2-</sup>, respectively. The above six ions are separately added to the mercury solutions whose concentrations at 40 mg/L and pH = 7. Subsequently, 0.05 g/L of adsorbent was added to the solution, and the solution was shaken for 7 h at 298 K.

Nature water often contains different ions, which may affect the adsorption of mercury ions by PPy-Fe<sub>3</sub>O<sub>4</sub>/Kaolin. Thus, three cations (Na<sup>+</sup>, K<sup>+</sup>, Ca<sup>2+</sup>) and three anions (Cl<sup>-</sup>, NO<sub>3</sub><sup>-</sup>, SO<sub>4</sub><sup>2-</sup>) were used to study the effect of ions on the adsorption effect.

As can be seen from **Fig. S4**, with the increasing ion concentration, the ability of PPy-Fe<sub>3</sub>O<sub>4</sub>/Kaolin to adsorb mercury decreases. Among the three anions, SO<sub>4</sub><sup>2-</sup> has the greatest influence on the adsorption performance of PPy-Fe<sub>3</sub>O<sub>4</sub>/Kaolin. When the concentration is 10 mM and 100 mM, the adsorption capacity of PPy-Fe<sub>3</sub>O<sub>4</sub>/Kaolin for mercury is reduced by 13.7% and 25.4%, respectively, compared with the concentration of 0 mM.

Among the three cations, Ca<sup>2+</sup> has the greatest influence on the adsorption performance. At a concentration of 10 mM and 100 mM, the adsorption capacity for mercury is reduced by 15.6% and 33.7%, respectively. This may be because Ca<sup>2+</sup> is bivalent and can occupy two active adsorption sites.

## 8. Model of thermodynamics

$$\Delta G^0 = -RT \ln K_d \quad (\text{S10})$$

$$\ln K_d = \frac{\Delta S^0}{R} - \frac{\Delta H^0}{RT} \quad (\text{S11})$$

where,  $K_d$  is a constant and can be calculated from  $q_e/C_e$ ;  $\Delta H^0$  and  $\Delta S^0$  are the slope and intercept of the  $\ln K_d$  vs.  $1/T$ , respectively.

## Reference

- [1] A. Özcan, A. Atılır Özcan, Y. Demirci, E. Şener, Preparation of Fe<sub>2</sub>O<sub>3</sub> modified kaolin and application in

- heterogeneous electro-catalytic oxidation of enoxacin, *Appl. Catal. B.* 200 (2017) 361-371.
- [2] K. Xia, Y. Guo, Q. Shao, Q. Zan, R. Bai, Removal of mercury (II) by EDTA-functionalized magnetic  $\text{CoFe}_2\text{O}_4@\text{SiO}_2$  nanomaterial with core-shell structure, *Nanomaterials* 9 (2019) 1532-1554.
- [3] Y. Liao, X. Wang, W. Qian, Y. Li, X. Li, D.G. Yu, Bulk synthesis, optimization, and characterization of highly dispersible polypyrrole nanoparticles toward protein separation using nanocomposite membranes, *J. Colloid Interface Sci.* 386 (2012) 148-157.
- [4] Y. Ma, D. Xing, W. Shao, X. Du, P. La, Preparation of polyamidoamine dendrimers functionalized magnetic graphene oxide for the adsorption of  $\text{Hg(II)}$  in aqueous solution, *J. Colloid Interface Sci.* 505 (2017) 352-363.
- [5] Y. Guo, J. Deng, J. Zhu, X. Zhou, R. Bai, Removal of mercury (II) and methylene blue from a wastewater environment with magnetic graphene oxide: adsorption kinetics, isotherms and mechanism, *RSC Adv.* 6 (2016) 82523-82536.
- [6] Y. Zhang, L. Yan, W. Xu, X. Guo, L. Cui, L. Gao, Q. Wei, B. Du, Adsorption of  $\text{Pb(II)}$  and  $\text{Hg(II)}$  from aqueous solution using magnetic  $\text{CoFe}_2\text{O}_4$ -reduced graphene oxide, *J. Mol. Liq.* 191 (2014) 177-182.
- [7] Y. Guo, Z. Wang, X. Zhou, R. Bai, Removal of mercury (II) from aqueous solution with three commercial raw activated carbons, *Res. Chem. Intermed.* 43 (2016) 2273-2297.
- [8] X. Wang, Z. Zhang, Y. Zhao, K. Xia, Y. Guo, Z. Qu, R. Bai, A mild and facile synthesis of amino functionalized  $\text{CoFe}_2\text{O}_4@\text{SiO}_2$  for  $\text{Hg(II)}$  removal, *Nanomaterials* 8 (2018) 673-693.
- [9] M. Anbia, S. Amirmahmoodi, Removal of  $\text{Hg(II)}$  and  $\text{Mn(II)}$  from aqueous solution using nanoporous carbon impregnated with surfactants, *Arabian J. Chem.* 9 (2016) S319-S325.
- [10] M.H. Dindar, M.R. Yaftian, M. Hajihassani, S. Rostamnia, Refinement of contaminated water by  $\text{Cr(VI)}$ ,  $\text{As(V)}$  and  $\text{Hg(II)}$  using N-donor ligands arranged on SBA-15 platform; batch and fixed-bed column methods, *J. Taiwan Inst. Chem. Eng.* 67 (2016) 325-337.
- [11] M. Shafiabadi, A. Dashti, H.A. Tayebi, Removal of  $\text{Hg(II)}$  from aqueous solution using polypyrrole/SBA-15 nanocomposite: Experimental and modeling, *Synth. Met.* 212 (2016) 154-160.
- [12] H. Javadian, M. Taghavi, Application of novel polypyrrole/thiolfunctionalized zeolite Beta/MCM-41 type mesoporous silica nanocomposite for adsorption of  $\text{Hg}^{2+}$  from aqueous solution and industrial wastewater: Kinetic, isotherm and thermodynamic studies, *Appl. Surf. Sci.* 289 (2014) 487-494.
- [13] C. Zhang, J. Sui, J. Li, Y. Tang, W. Cai, Efficient removal of heavy metal ions by thiol-functionalized superparamagnetic carbon nanotubes, *Chem. Eng. J.* 210 (2012) 45-52.
- [14] A.S. Krishna Kumar, S.J. Jiang, W.L. Tseng, Facile synthesis and characterization of thiol-functionalized graphene oxide as effective adsorbent for  $\text{Hg(II)}$ , *J. Environ. Chem. Eng.* 4 (2016) 2052-2065.
- [15] Y. Yu, J. Addai-Mensah, D. Losic, Functionalized diatom silica microparticles for removal of mercury ions, *Sci. Technol. Adv. Mater.* 13 (2012) 015008.
- [16] Y. Shen, N. Jiang, S. Liu, C. Zheng, X. Wang, T. Huang, Y. Guo, R. Bai, Thiol functionalization of short channel SBA-15 through a safe, mild and facile method and application for the removal of mercury (II), *J. Environ. Chem. Eng.* 6 (2018) 5420-5433.
